# Supplementary material for: High Phenotypic Variation between an In Vitro-Passaged Fowl Adenovirus Serotype 1 (FAdV-1) and Its Virulent Progenitor Strain despite Almost Complete Sequence Identity of the Whole Genomes
Source: MDPI journal article supplement (doi:10.3390/v14020358), 2022-02-09
Supplement: s1 [file s1]

**Table S1.** Primer sequences and description of protocols for Sanger sequencing.

| Primer name     | Primer sequence (5' – 3') |
|-----------------|---------------------------|
| FAdV1- 37116 fw | GTAGCATACCGGGACAGGT       |
| FAdV1- 37697 rv | CTAATGGTAACGTGGATAATGC    |
| FAdV1- 39835 fw | CAAGTCCGACGCTCTTACG       |
| FAdV1- 40449 rv | GATGTTCCATACCCGGTACT      |
| FAdV1- 40429 fw | CAGTACCGGGTATGGAACAT      |
| FAdV1- 41298 rv | CCAGGATGACGTCATTGATA      |
| FAdV1- 41200 fw | GTACATTCCGGCAAATGTAC      |
| FAdV1- 42174 rv | GGATGACATTTTCGGCTATCA     |
| FAdV1- 42114 fw | GGCAATACAAATTTGAATGGCG    |
| FAdV1- 42989 rv | GCAAATGACTGGAATCCAGATC    |
| FAdV1- 42958 fw | AGAATCATCTTAAAGGAGCCCT    |
| FAdV1- 43777 rv | GCACGGTGTCGCTATACG        |

Oligonucleotides were synthesized at Eurofins MWG Operon (Ebersberg, Germany). All PCR amplifications were carried out in 25 µl reactions containing 3 µl DNA template, 2.5 µl of 10x PCR buffer (Invitrogen, Vienna, Austria), 0.5 µl dNTPs (10 µM stock), 0.75 µl MgCl<sub>2</sub> (25 µM stock), 1 µl each primer (25 µM stock), 0.2 µl Taq-Polymerase (1.25 units/mL) and 16.05 µl of ultrapure water. Reactions were run on a Bio-Rad PTC-0220 thermal cycler (Bio-Rad Laboratories, Hercules, CA, USA) using the following parameters: initial denaturation at 94°C for 2 minutes, 35 cycles of 94°C for 1 minute, 52°C for 1 minute and 72°C for 1 minute, followed by a final extension at 72°C for 10 minutes. After electrophoretic separation on a 1% gel for 40 minutes, bands were excised from the gel and DNA extracted with the QIAquick Gel Extraction kit (Qiagen, Vienna, Austria) according to manufacturer's instructions. Sequencing service was carried out by LGC Genomics GmbH (Berlin, Germany).
